# Supplementary material for: The effect of single atom substitution (O, S or Se) on photocatalytic hydrogen evolution for triazine-based conjugated porous polymers
Source: Royal Society of Chemistry journal article supplement (doi:10.1039/d0tc00942c), 2020-01-01
Supplement: d0tc00942c1.pdf [file d0tc00942c1.pdf]

Electronic Supplementary Information for

**Effect of Single Atom Substitution (O, S, Se) on the Photocatalytic Hydrogen  
Evolution for Triazine Based Conjugated Porous Polymers**

Jie Yu,<sup>1</sup> Shufang Chang,<sup>1</sup> Xiaoxiang Xu,<sup>\*,1,2</sup> Xiaoming He,<sup>\*,3</sup> and Chi Zhang<sup>\*,1</sup>

<sup>1</sup>Shanghai Key Lab of Chemical Assessment and Sustainability, School of Chemical Science and  
Engineering, Tongji University, 1239 Siping Road, Shanghai, 200092, China

<sup>2</sup>Clinical and Central Lab, Putuo People's Hospital, Tongji University, 1291 Jiangning Road,  
Shanghai, 200060, China

<sup>3</sup>School of Chemistry and Chemical Engineering, Shanxi Normal University, 620 West Chang' an  
Road, Xi' an, 710119, China

\*Corresponding Author Email: [chizhang@tongji.edu.cn](mailto:chizhang@tongji.edu.cn), [xmhe@snnu.edu.cn](mailto:xmhe@snnu.edu.cn), [xxxu@tongji.edu.cn](mailto:xxxu@tongji.edu.cn)

\*To whom correspondence should be addressed

## Supplementary Figures

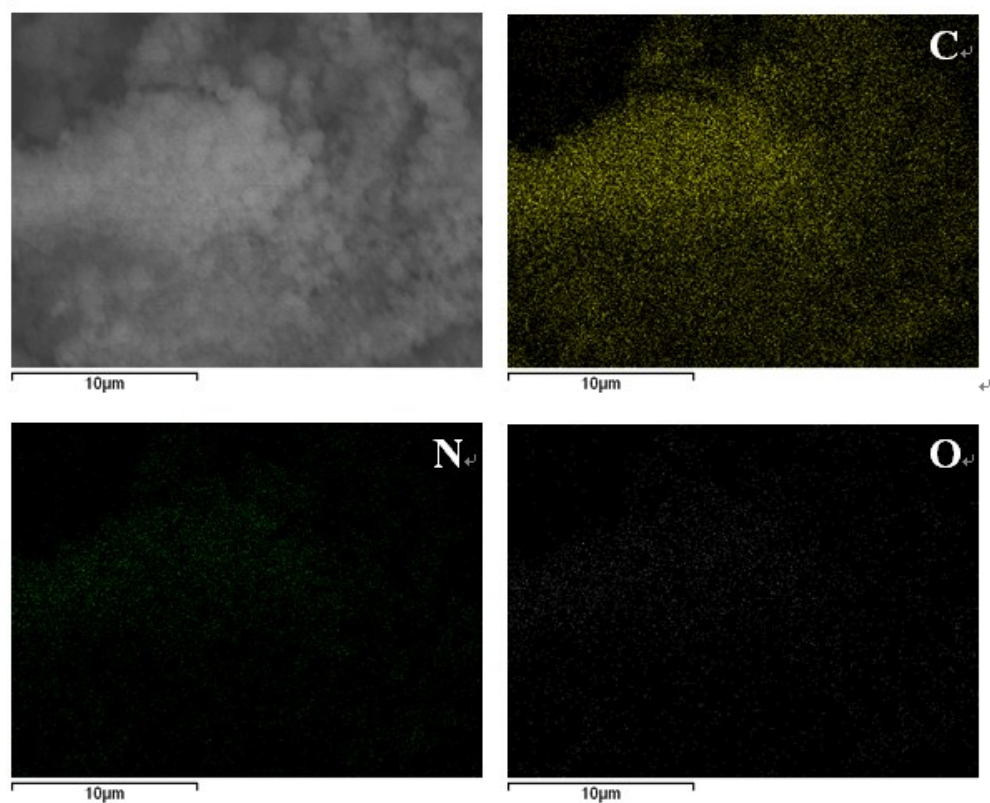

**Fig. S1.** Energy-dispersive X-ray (EDX) spectra of P3.

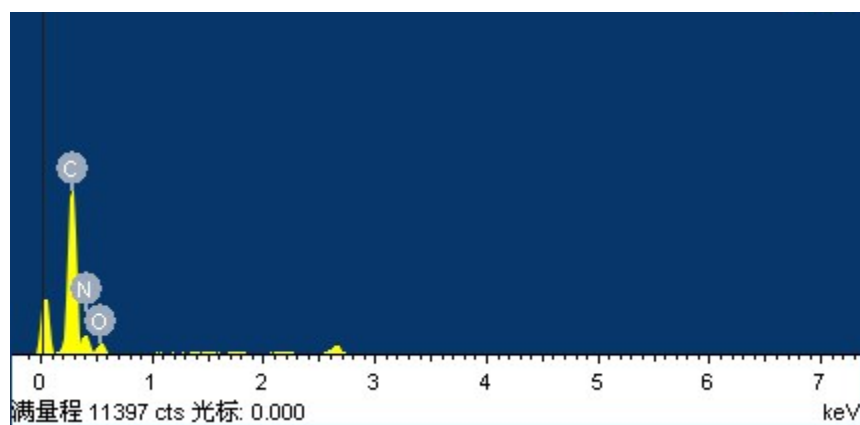

**Fig. S2.** Energy-dispersive X-ray (EDX) spectra of P3.

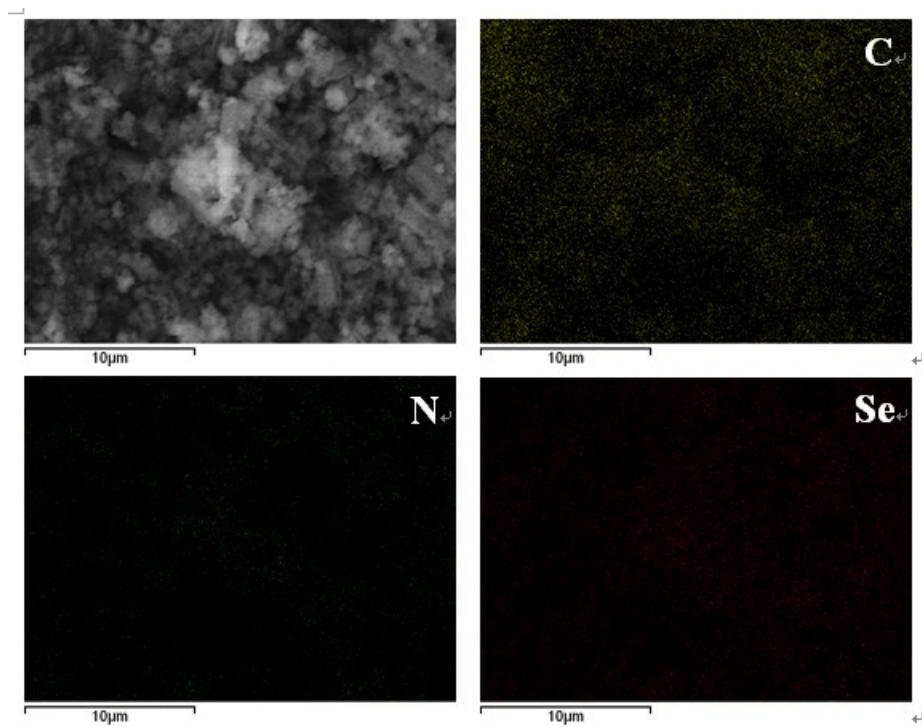

**Fig. S3.** Energy-dispersive X-ray (EDX) spectra of P4.

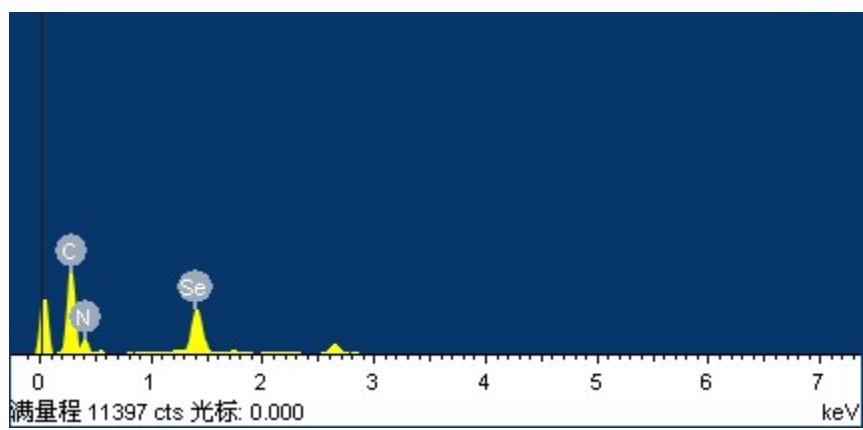

**Fig. S4.** Energy-dispersive X-ray (EDX) spectra of P4.

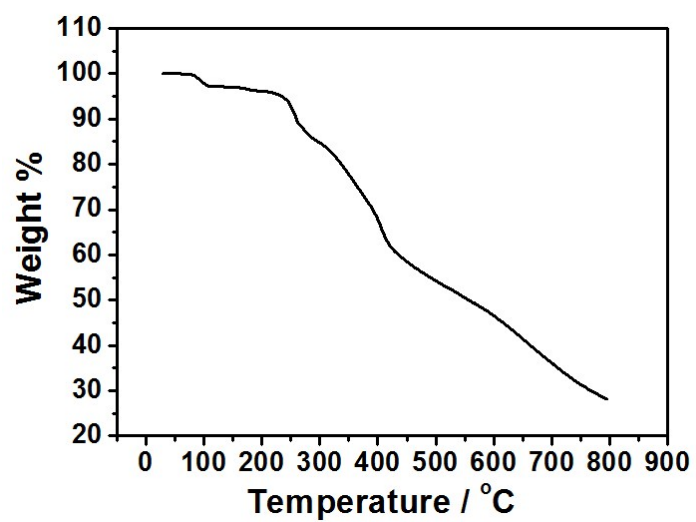

**Fig. S5.** Thermogravimetric analysis (TGA) for polymer P3.

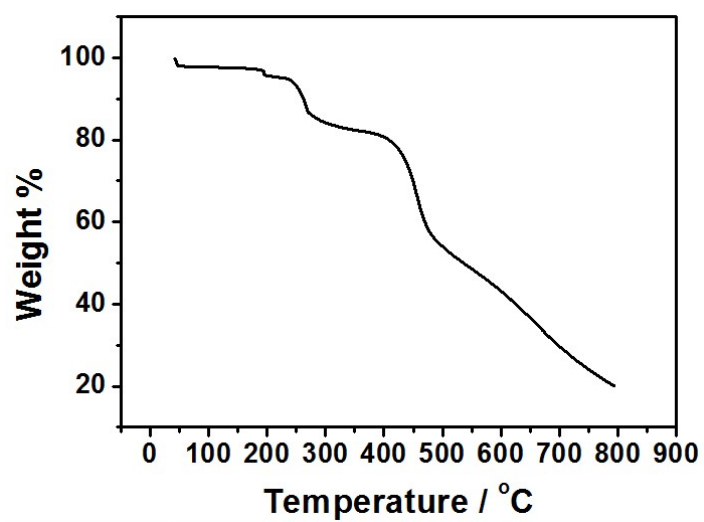

**Fig. S6.** Thermogravimetric analysis (TGA) for polymer P4.

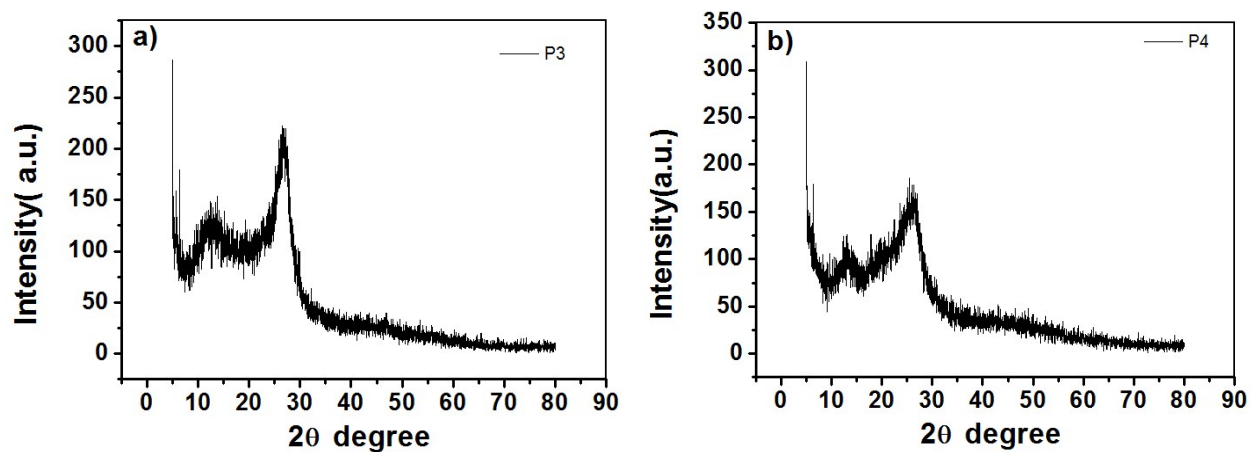

**Fig. S7.** a) Powder X-ray diffraction (PXRD) of P3. b) Powder X-ray diffraction (PXRD) of P4.

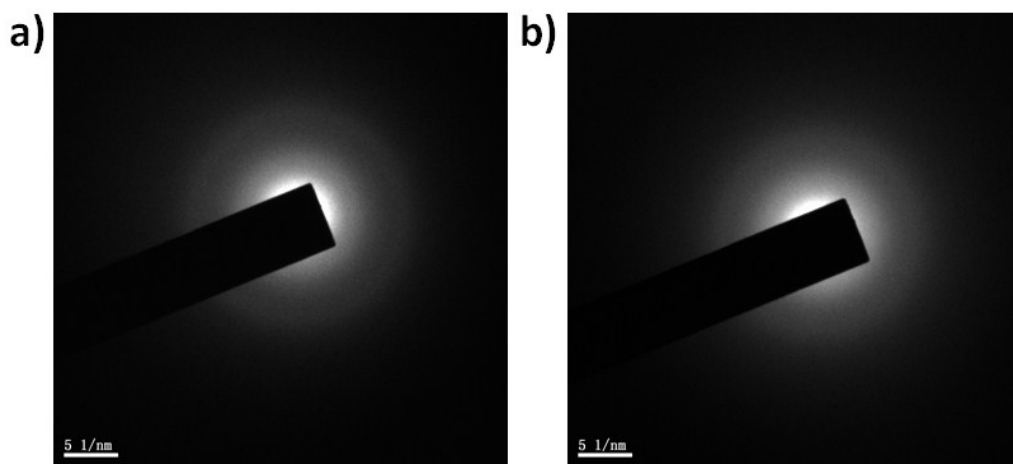

**Fig. S8.** (a) Selected area electron diffraction (SAED) of P3. (b) Selected area electron diffraction (SAED) of P4.

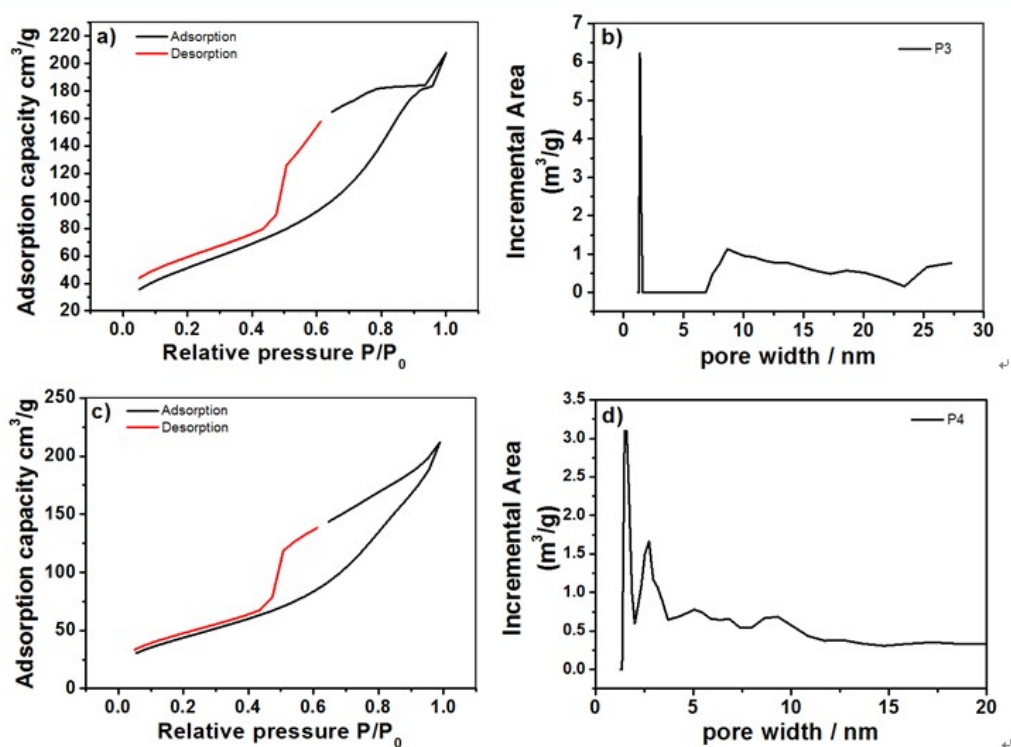

**Fig. S9.** (a) Nitrogen adsorption isotherm (red line) and desorption isotherm (black line) for P3 recorded at 77 K, (b) profile of the calculated pore size distribution for P3.  $P/P_0$ , vapor pressure over saturation pressure, (c) Nitrogen adsorption isotherm (red line) and desorption isotherm (black line) for P4 recorded at 77 K, (d) profile of the calculated pore size distribution for P4.  $P/P_0$ , vapor pressure over saturation pressure.

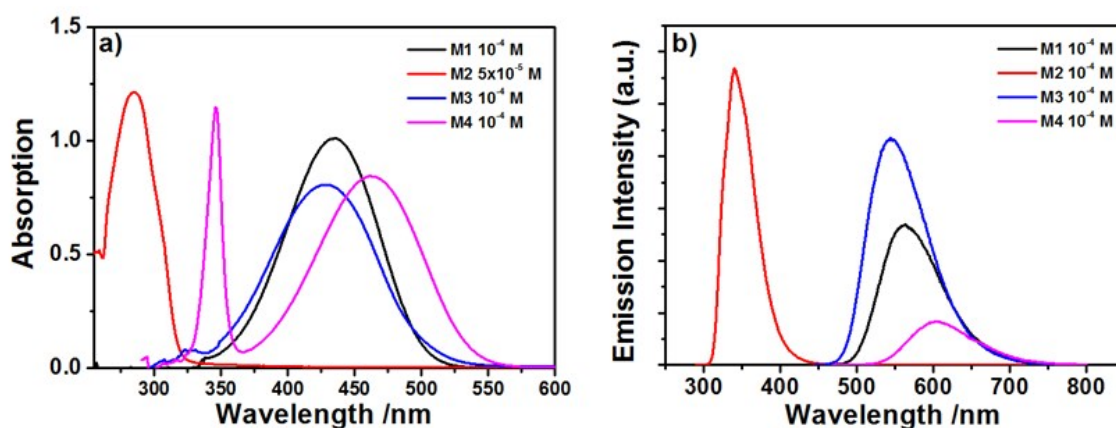

**Fig. S10.** a) UV-vis absorption spectra and b) emission spectra of monomer M1, M2, M3 and M4 in DMF solution at 298 K.

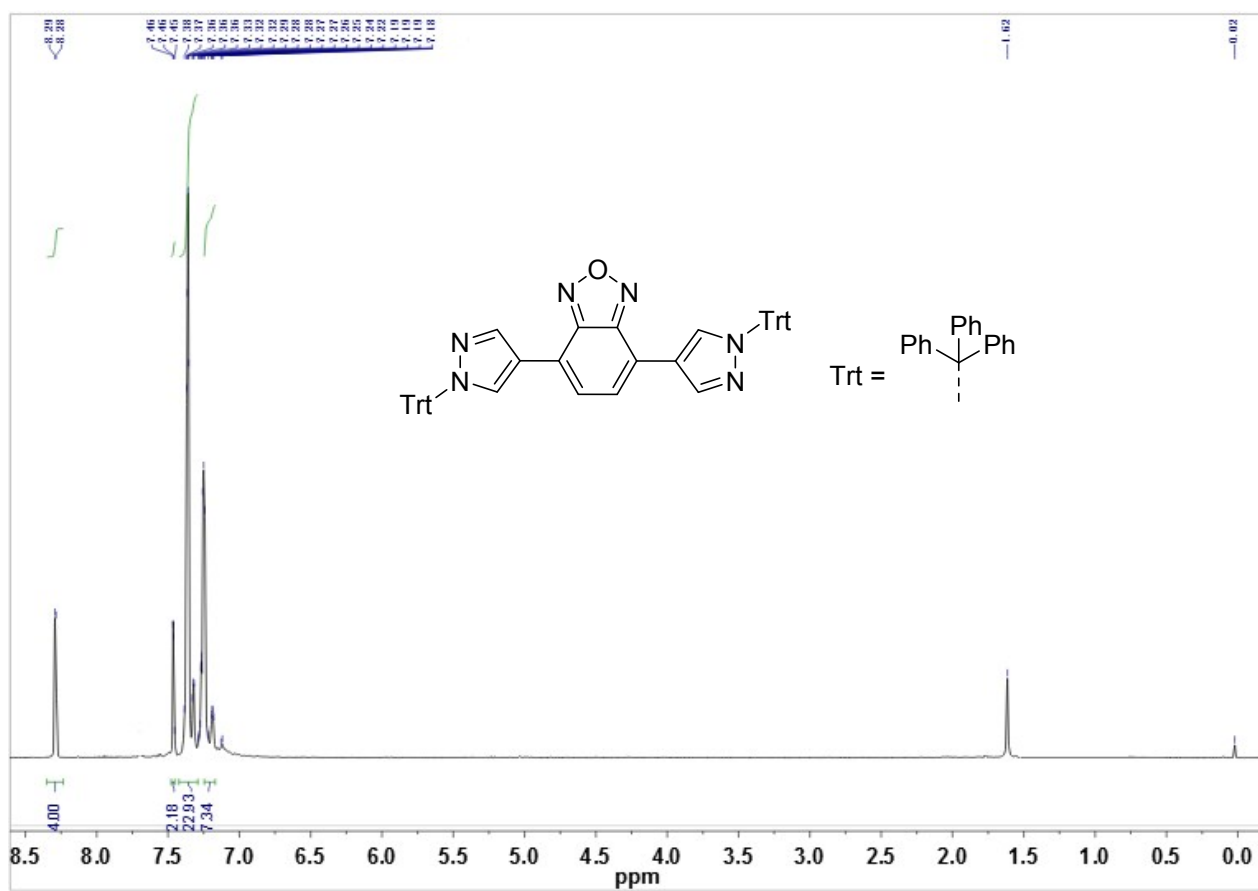

Fig. S11. <sup>1</sup>H NMR of 4 in CDCl<sub>3</sub>.

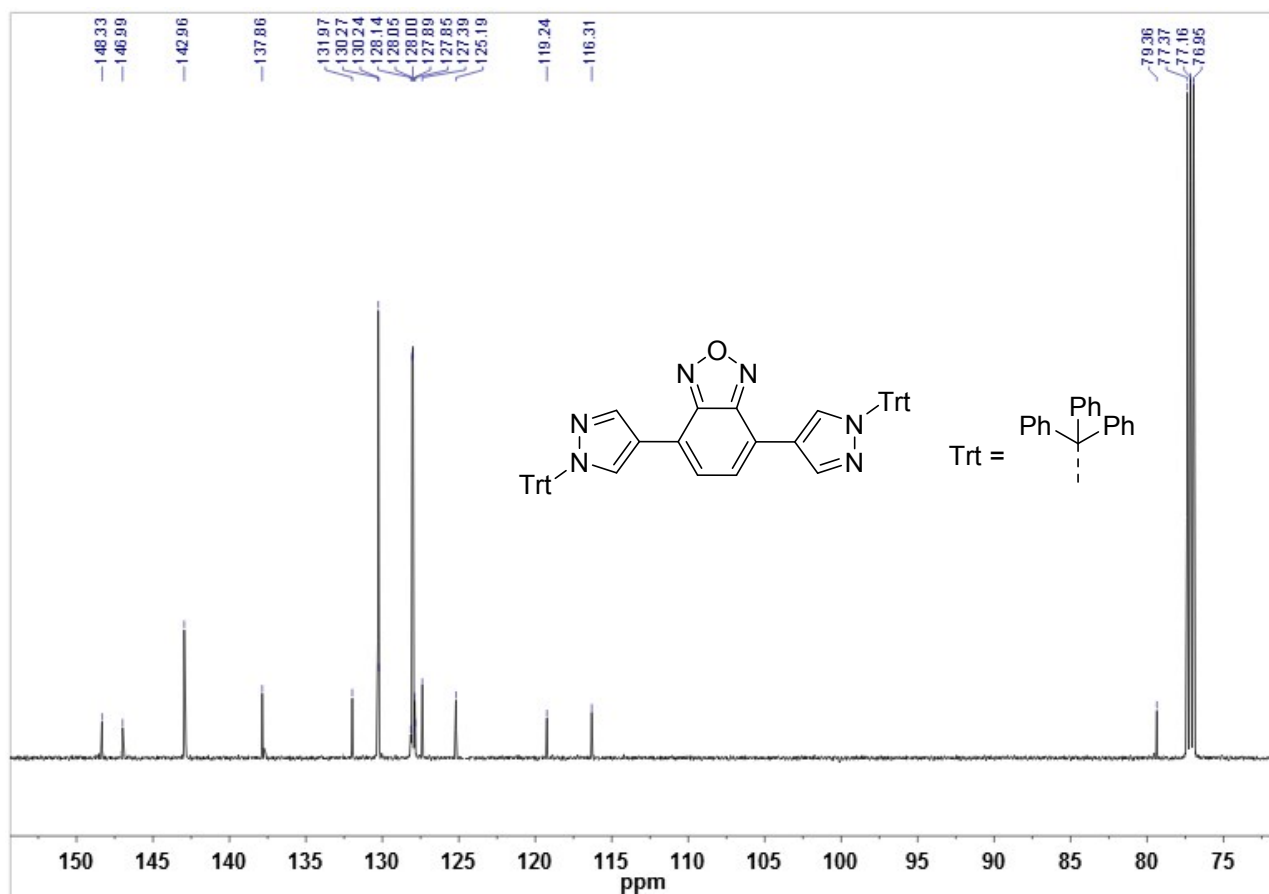

**Fig. S12.** <sup>13</sup>C NMR of 4 in CDCl<sub>3</sub>.

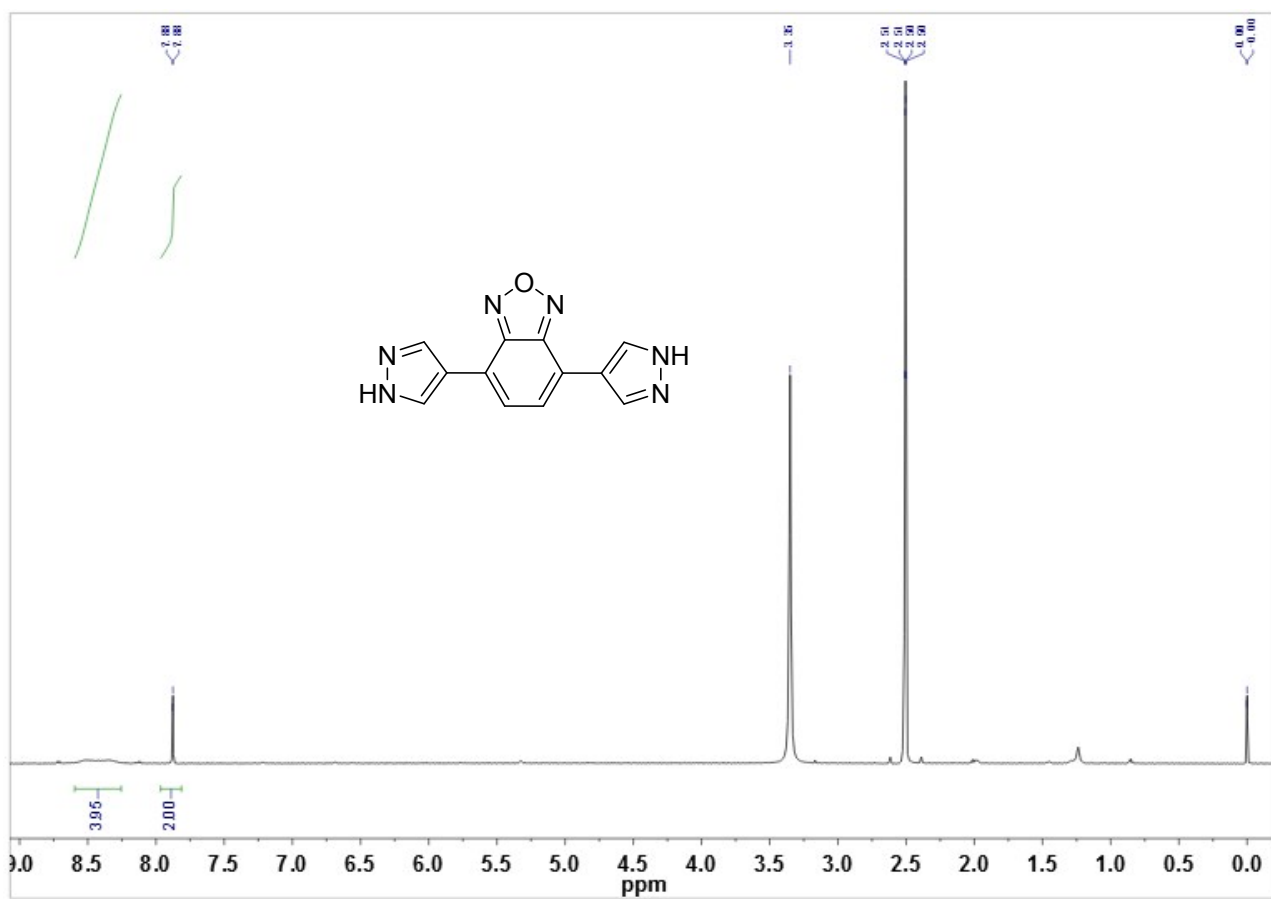

**Fig. S13.**  $^1\text{H}$  NMR of M3 in  $\text{d}_6\text{-DMSO}$ .

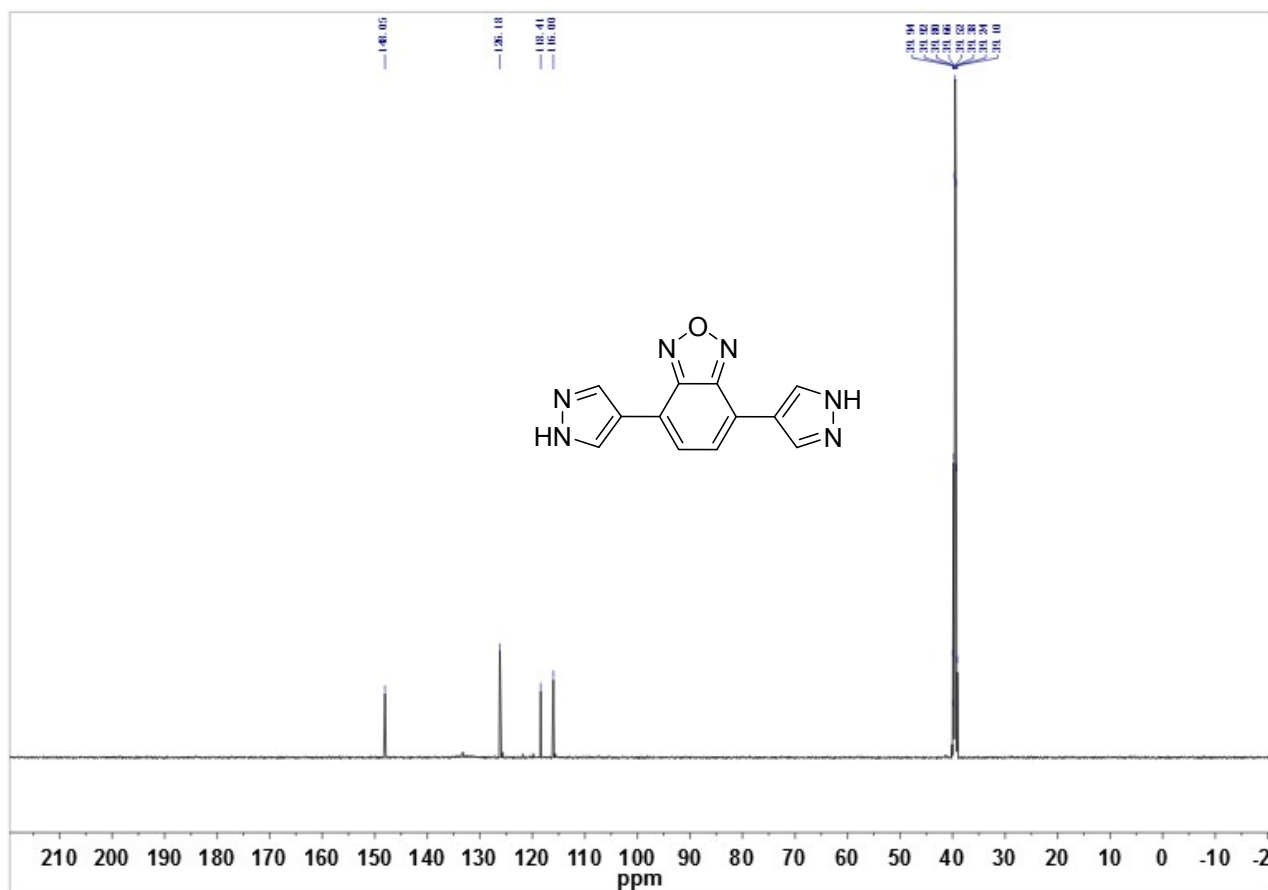

**Fig. S14.** <sup>13</sup>C NMR of M3 in d<sub>6</sub>-DMSO.

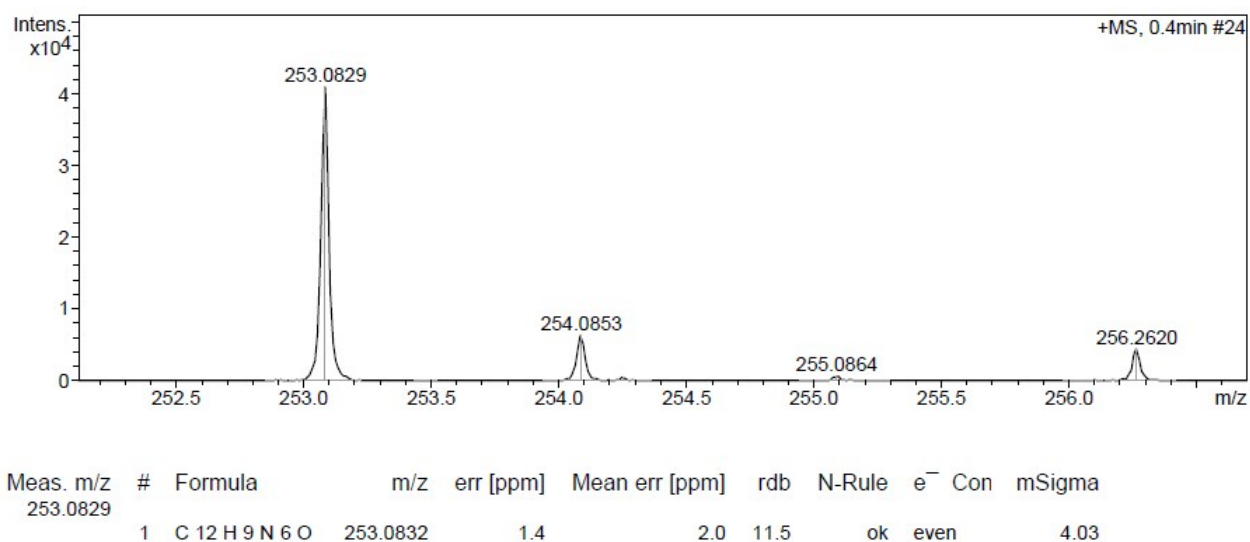

**Fig. S15.** High resolution mass spectrum of M3 in methanol.

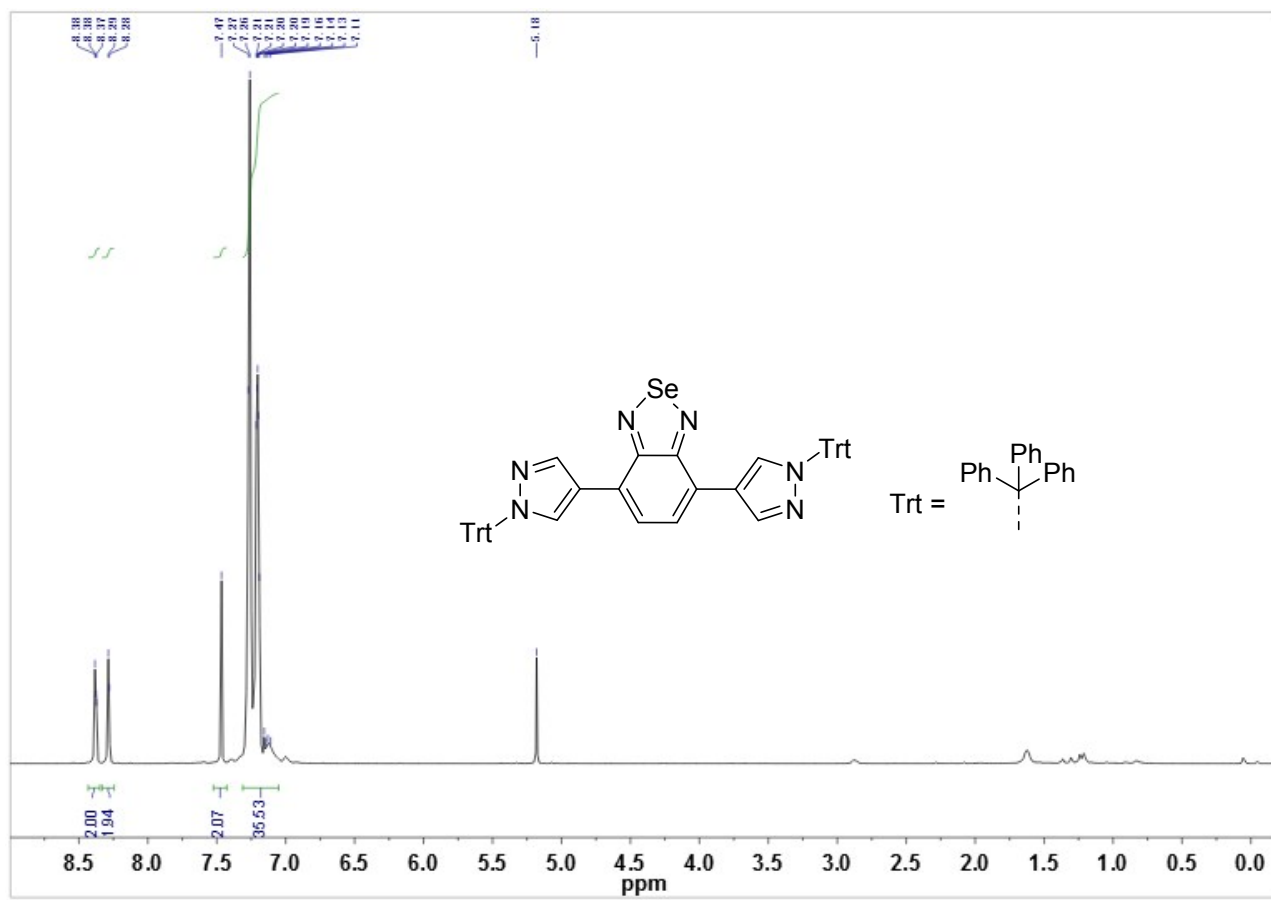

**Fig. S16.**  $^1\text{H}$  NMR of **5** in  $\text{CDCl}_3$ .

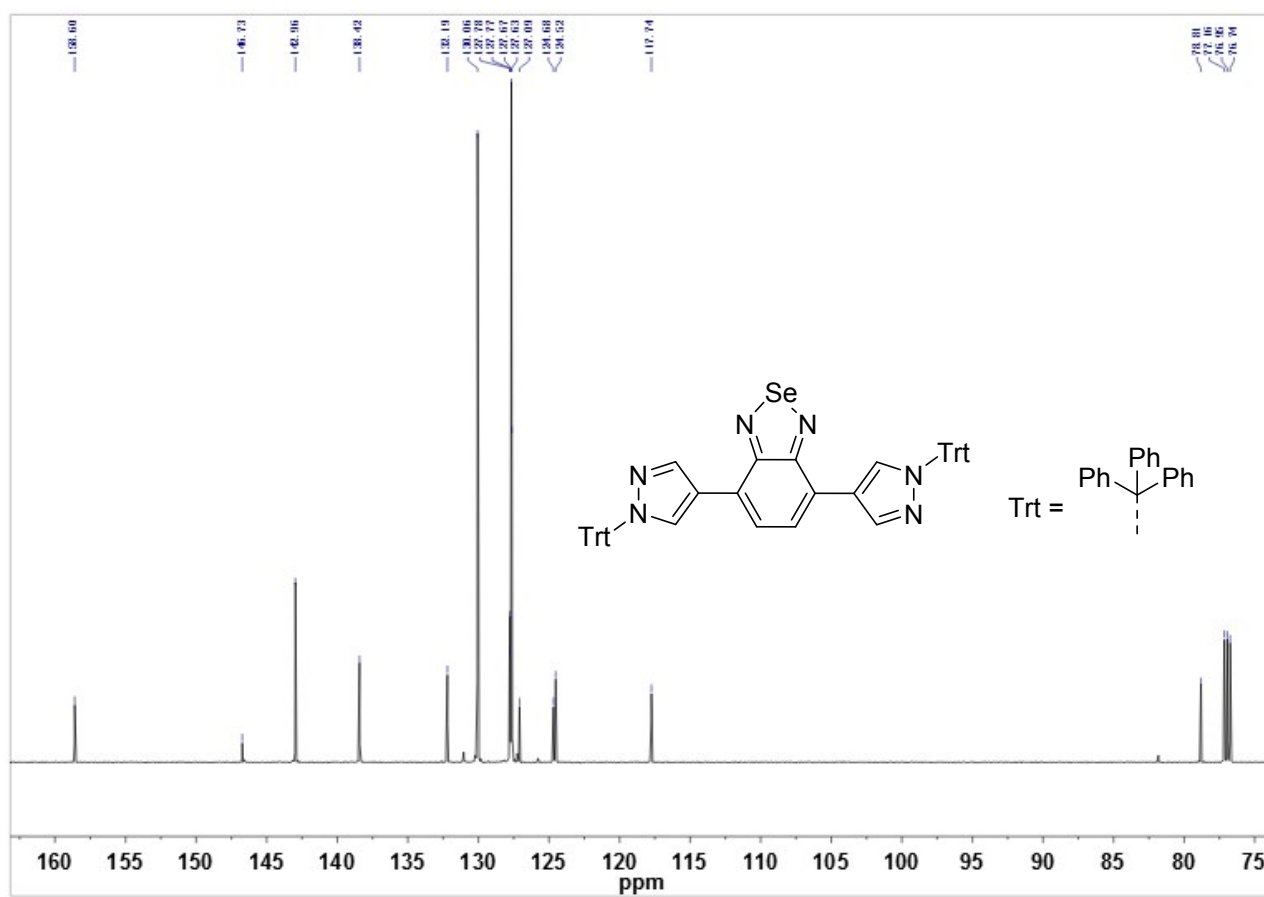

**Fig. S17.** <sup>13</sup>C NMR of 5 in CDCl<sub>3</sub>.

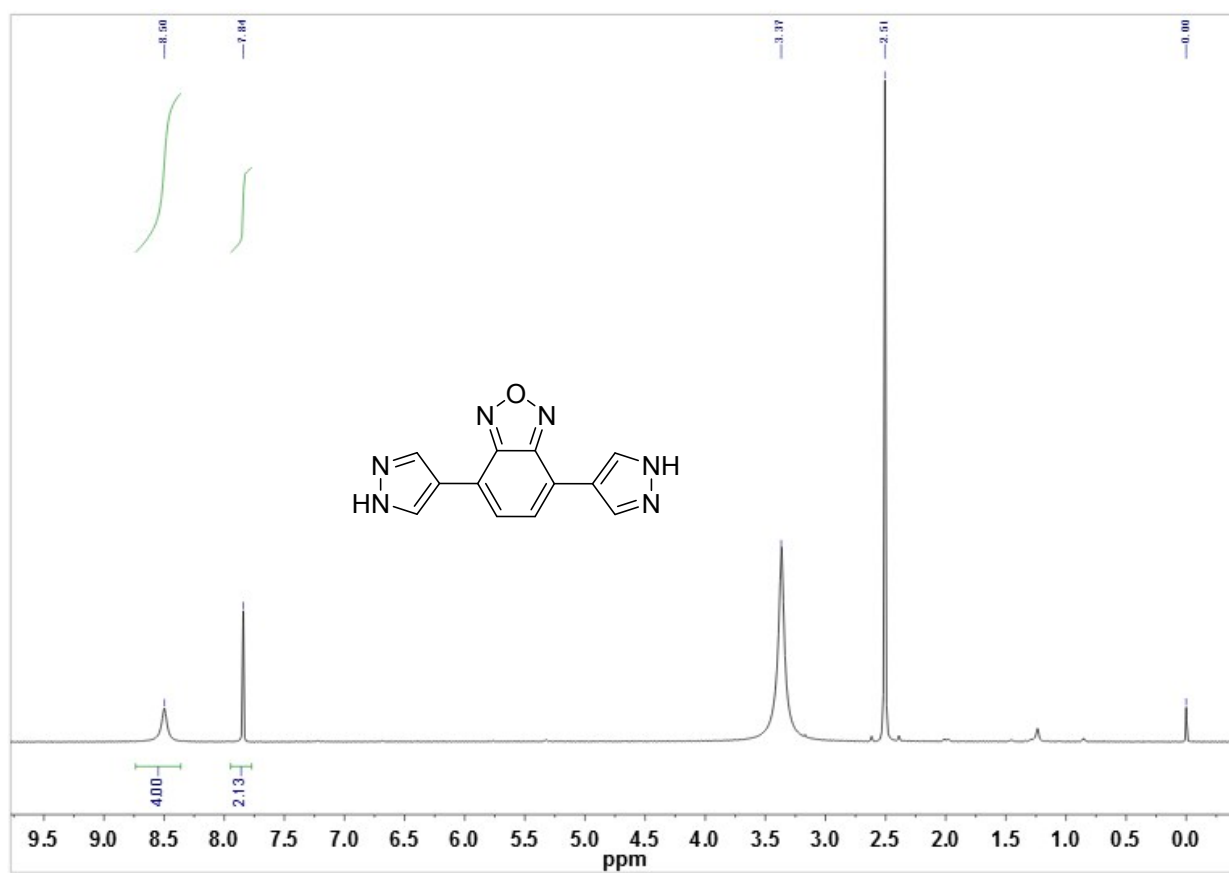

**Fig. S18.**  $^1\text{H}$  NMR of M4 in  $\text{d}_6\text{-DMSO}$ .

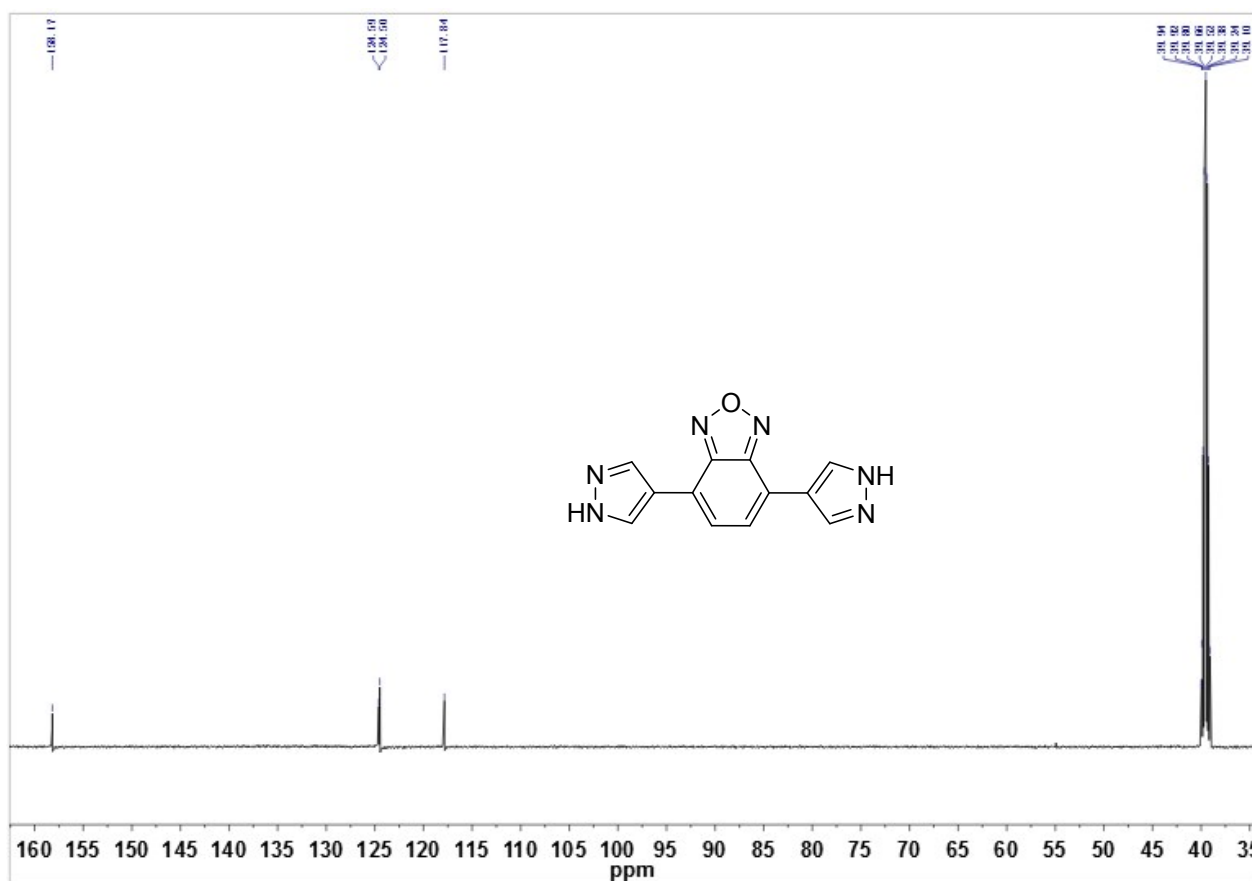

**Fig. S19.** <sup>13</sup>C NMR of M4 in d<sub>6</sub>-DMSO.

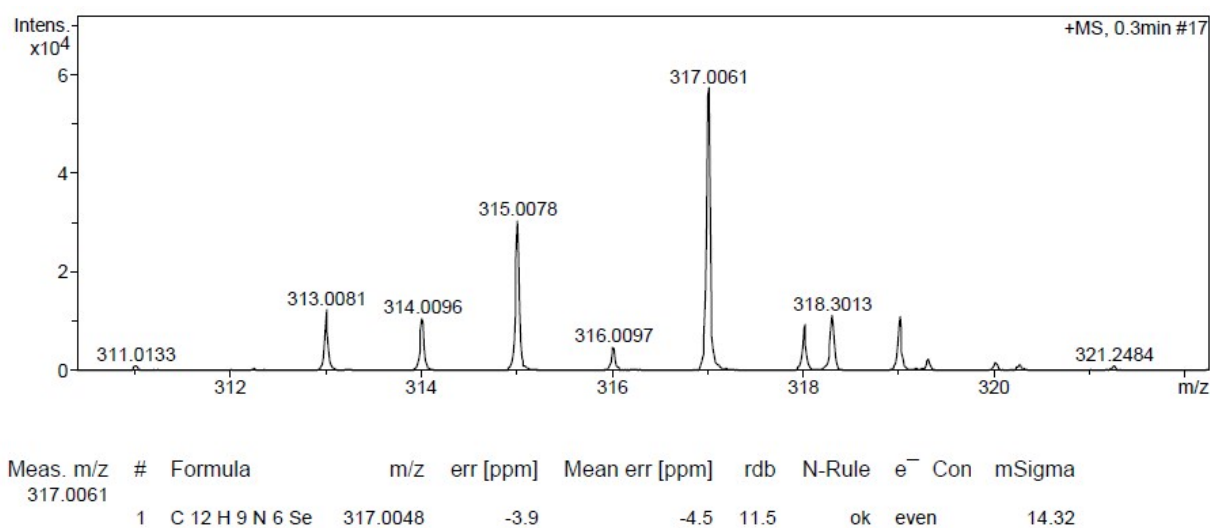

**Fig. S20.** High resolution mass spectrum of M4 in methanol.
